# Supplementary material
Source: PubMed Central journal article supplement (PMC4297737)
Supplement: NIHMS647093-supplement-1.pdf [file NIHMS647093-supplement-1.pdf]

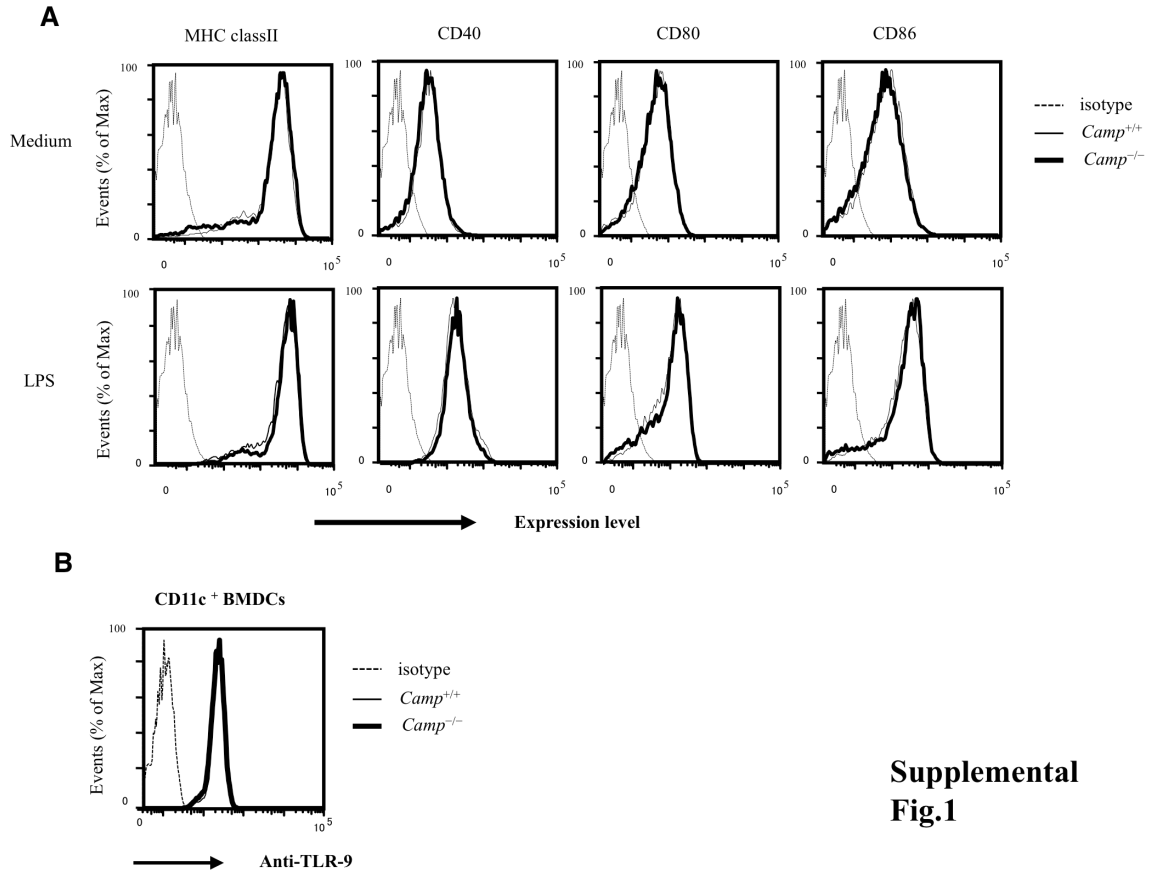

**Supplemental  
Fig.1**

**Supplemental Figure1. Development of BMDCs is normal in *Camp*<sup>-/-</sup> mice.**

A, WT and *Camp*<sup>-/-</sup> GM-CSF-BMDCs were cultured in GM-CSF medium or stimulated with 500 ng/ml LPS for 15 h. Cells were stained with FITC-anti-MHC classII, FITC-anti-CD40, FITC-anti-CD80 or FITC-anti-CD86. B, WT and *Camp*<sup>-/-</sup> GM-CSF BMDCs were stained with APC-anti-CD11c and then, permeabilized and stained with FITC-isotype control or FITC-anti-mTLR9. Data were representative of three independent experiments.

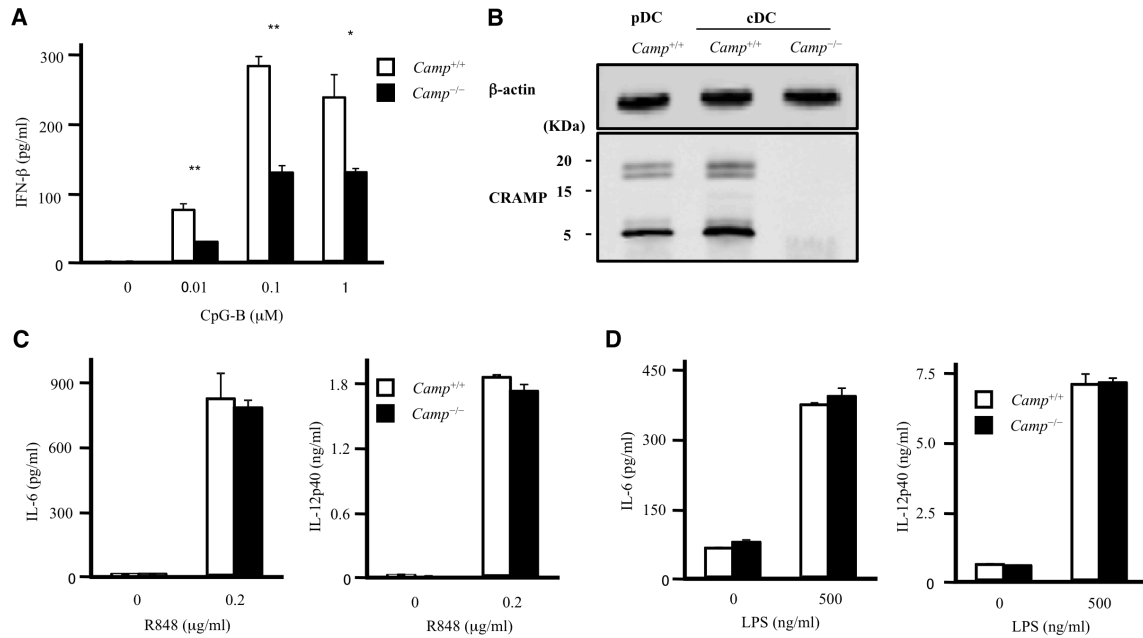

**Supplemental  
Fig. 2**

**Supplemental Figure 2. Impaired CpG responses in *Camp*<sup>-/-</sup> BMDCs.**

A, WT and *Camp*<sup>-/-</sup> GM-CSF-BMDCs were stimulated with various concentration of CpG-B for 15 h. IFN-β concentration in the supernatants was measured by ELISA. B, Flt3L pDCs and cDCs express both full-length CRAMP protein and CRAMP peptide by Western blotting. C and D, WT and *Camp*<sup>-/-</sup> Flt3L pDCs (C) and cDCs (D) were stimulated with R848 and LPS for 15 h, respectively. The cytokine concentration in the supernatants was measured by ELISA. \*P < 0.05, \*\*P < 0.01 Data were representative of three independent experiments.
